# Supplementary material
Source: PubMed Central journal article supplement (PMC5100776)
Supplement: supp_pp.16.01210_PP2016-01210DR1_Supplemental_Materialtbls.pdf [file supp_pp.16.01210_PP2016-01210DR1_Supplemental_Materialtbls.pdf]

1 **Supplemental Table S1.** Number and percentage of sequencing reads mapped onto the  
 2 allotetraploid cotton (AD) genome sequence.

| Accession | Genome designation | Total reads | Clean reads | A            | D            | AD overlap | AD           |         |
|-----------|--------------------|-------------|-------------|--------------|--------------|------------|--------------|---------|
|           |                    |             |             | Mapped reads | Mapped reads | overlap    | Mapped reads | percent |
| TM-1_1R   | AD                 | 55,702,587  | 47,324,516  | 23,110,443   | 23,607,780   | 5,176,813  | 41,671,862   | 88.10%  |
| TM-1_2R   | AD                 | 61,147,447  | 51,638,483  | 25,122,174   | 25,855,464   | 5,773,553  | 45,458,603   | 88.00%  |
| TM-1_3R   | AD                 | 53,827,026  | 46,268,794  | 22,069,500   | 22,830,235   | 5,636,361  | 39,664,962   | 85.70%  |

3  
 4

5 **Supplemental Table S2.** Number and expression levels of A and D homoeologous genomes  
 6

| Subgenome | Genes<br>number | FPKM       |           |           |           |
|-----------|-----------------|------------|-----------|-----------|-----------|
|           |                 | R1         | R2        | R3        | mean      |
| A         | 16711           | 492777.76  | 466580.17 | 438941.09 | 466099.67 |
| D         | 17400           | 514536.93  | 488100.39 | 457388.77 | 486675.36 |
| total     | 34111           | 1007314.69 | 954680.57 | 896329.85 | 952775.04 |

7  
 8

9 **Supplemental Table S3.** Correlation coefficients between immunostaining and gene  
 10 densities of homoeologous A chromosomes in *G. hirsutum* (TM-1).

11

| Gene<br>H3K4me3 | A01                | A02                  | A03                  | A04                  | A05                  | A06                  | A07                  | A08                  | A09                  | A10                  | A11                  | A12                  | A13                  |
|-----------------|--------------------|----------------------|----------------------|----------------------|----------------------|----------------------|----------------------|----------------------|----------------------|----------------------|----------------------|----------------------|----------------------|
|                 | A01                | 0.846 <sup>a,*</sup> | 0.514                | 0.648 <sup>a</sup>   | 0.148                | 0.549                | 0.734 <sup>a</sup>   | 0.730 <sup>a</sup>   | 0.721 <sup>a</sup>   | 0.366                | 0.682 <sup>a</sup>   | 0.716 <sup>a</sup>   | 0.334                |
| A02             | 0.578              | 0.886 <sup>b,*</sup> | 0.609 <sup>a</sup>   | 0.278                | 0.591                | 0.456                | 0.628 <sup>a</sup>   | 0.719 <sup>a</sup>   | 0.284                | 0.740 <sup>a</sup>   | 0.778 <sup>a</sup>   | 0.757 <sup>a</sup>   | 0.753 <sup>a</sup>   |
| A03             | 0.802 <sup>a</sup> | 0.720 <sup>a</sup>   | 0.824 <sup>a,*</sup> | 0.047                | 0.692 <sup>a</sup>   | 0.767 <sup>a</sup>   | 0.080                | 0.730 <sup>a</sup>   | 0.278                | 0.804 <sup>a</sup>   | 0.812 <sup>a</sup>   | 0.532                | 0.232                |
| A04             | 0.062              | 0.155                | 0.210                | 0.808 <sup>b,*</sup> | 0.259                | 0.006                | 0.002                | 0.111                | 0.087                | 0.317                | 0.018 <sup>c</sup>   | 0.559                | 0.571                |
| A05             | 0.832 <sup>a</sup> | 0.506                | 0.645 <sup>a</sup>   | 0.101                | 0.943 <sup>b,*</sup> | 0.801 <sup>a</sup>   | 0.747 <sup>a</sup>   | 0.690 <sup>a</sup>   | 0.307                | 0.608 <sup>a</sup>   | 0.840 <sup>a</sup>   | 0.218                | 0.096                |
| A06             | 0.801 <sup>a</sup> | 0.533                | 0.782 <sup>a</sup>   | 0.788 <sup>a</sup>   | 0.445                | 0.851 <sup>b,*</sup> | 0.736 <sup>a</sup>   | 0.837 <sup>a</sup>   | 0.217                | 0.803 <sup>a</sup>   | 0.644 <sup>a</sup>   | 0.296                | 0.161                |
| A07             | 0.790 <sup>a</sup> | 0.898 <sup>a</sup>   | 0.728 <sup>a</sup>   | 0.090                | 0.767 <sup>a</sup>   | 0.703 <sup>a</sup>   | 0.949 <sup>b,*</sup> | 0.787 <sup>a</sup>   | 0.027                | 0.818 <sup>a</sup>   | 0.869 <sup>a</sup>   | 0.759 <sup>a</sup>   | 0.666 <sup>a</sup>   |
| A08             | 0.819 <sup>a</sup> | 0.819 <sup>a</sup>   | 0.841 <sup>a</sup>   | 0.076                | 0.770 <sup>a</sup>   | 0.738 <sup>a</sup>   | 0.418                | 0.876 <sup>b,*</sup> | 0.026                | 0.854 <sup>a</sup>   | 0.812 <sup>a</sup>   | 0.710 <sup>a</sup>   | 0.532                |
| A09             | 0.398              | 0.218                | 0.292                | 0.700 <sup>a</sup>   | 0.519                | 0.483                | 0.244                | 0.211                | 0.894 <sup>b,*</sup> | 0.067                | 0.384                | 0.352                | 0.456                |
| A10             | 0.840 <sup>a</sup> | 0.584                | 0.612 <sup>a</sup>   | 0.055                | 0.936 <sup>a</sup>   | 0.605 <sup>a</sup>   | 0.819 <sup>a</sup>   | 0.686 <sup>a</sup>   | 0.023                | 0.730 <sup>b,*</sup> | 0.710 <sup>a</sup>   | 0.466                | 0.373                |
| A11             | 0.598              | 0.458                | 0.622 <sup>a</sup>   | 0.124                | 0.801 <sup>a</sup>   | 0.829 <sup>a</sup>   | 0.694 <sup>a</sup>   | 0.664 <sup>a</sup>   | 0.410 <sup>a</sup>   | 0.585 <sup>a</sup>   | 0.842 <sup>b,*</sup> | 0.131                | 0.005                |
| A12             | 0.200              | 0.683 <sup>a</sup>   | 0.304                | 0.655 <sup>a</sup>   | 0.234                | 0.040                | 0.592                | 0.473                | 0.763 <sup>a</sup>   | 0.518 <sup>b</sup>   | 0.417                | 0.952 <sup>b,*</sup> | 0.871 <sup>a</sup>   |
| A13             | 0.393              | 0.645 <sup>a</sup>   | 0.422                | 0.505 <sup>a</sup>   | 0.319                | 0.234                | 0.729 <sup>a</sup>   | 0.507                | 0.657 <sup>a</sup>   | 0.677 <sup>a</sup>   | 0.517                | 0.942 <sup>a</sup>   | 0.919 <sup>b,*</sup> |

12 <sup>a</sup> P<0.01; \* designated pair

13

14 **Supplemental Table S4.** Correlation coefficients between immunostaining and gene  
 15 densities of homoeologous D chromosomes in *G. hirsutum* (TM-1).  
 16

| Gene<br>H3K4me3 | D01                  | D02                  | D03                  | D04                  | D05                  | D06                  | D07                  | D08                  | D09                  | D10                  | D11                  | D12                  | D13                  |
|-----------------|----------------------|----------------------|----------------------|----------------------|----------------------|----------------------|----------------------|----------------------|----------------------|----------------------|----------------------|----------------------|----------------------|
| D01             | 0.850 <sup>a,*</sup> | 0.615                | 0.256                | 0.771                | 0.463                | 0.749 <sup>a</sup>   | 0.832 <sup>a</sup>   | 0.807 <sup>a</sup>   | 0.027                | 0.787 <sup>a</sup>   | 0.788 <sup>a</sup>   | 0.673                | 0.824 <sup>a</sup>   |
| D02             | 0.743 <sup>a</sup>   | 0.801 <sup>a,*</sup> | 0.700                | 0.318                | 0.260                | 0.616                | 0.747 <sup>a</sup>   | 0.599                | 0.305                | 0.761 <sup>a</sup>   | 0.772 <sup>a</sup>   | 0.782 <sup>a</sup>   | 0.624                |
| D03             | 0.439                | 0.639                | 0.862 <sup>a,*</sup> | 0.726                | 0.103                | 0.260                | 0.334                | 0.552                | 0.666 <sup>b</sup>   | 0.395                | 0.348 <sup>c</sup>   | 0.120                | 0.687                |
| D04             | 0.821 <sup>a</sup>   | 0.727                | 0.743                | 0.940 <sup>a,*</sup> | 0.452                | 0.740                | 0.808 <sup>a</sup>   | 0.838 <sup>a</sup>   | 0.086                | 0.737                | 0.827 <sup>a</sup>   | 0.854 <sup>a</sup>   | 0.841 <sup>a</sup>   |
| D05             | 0.200                | 0.195                | 0.179                | 0.429                | 0.924 <sup>a,*</sup> | 0.272                | 0.553                | 0.146                | 0.830 <sup>a</sup>   | 0.398                | 0.678 <sup>b</sup>   | 0.378                | 0.163                |
| D06             | 0.726 <sup>a</sup>   | 0.429                | 0.342                | 0.248                | 0.675                | 0.795 <sup>a,*</sup> | 0.654                | 0.591                | 0.508                | 0.706 <sup>a</sup>   | 0.673 <sup>b</sup>   | 0.208                | 0.579                |
| D07             | 0.776 <sup>a</sup>   | 0.369                | 0.252                | 0.674                | 0.495                | 0.624                | 0.819 <sup>a,*</sup> | 0.692                | 0.058                | 0.606                | 0.798 <sup>a</sup>   | 0.509                | 0.585                |
| D08             | 0.763 <sup>a</sup>   | 0.612                | 0.668                | 0.893 <sup>a</sup>   | 0.219                | 0.562                | 0.738 <sup>a</sup>   | 0.767 <sup>a,*</sup> | 0.312                | 0.682                | 0.700 <sup>a</sup>   | 0.792 <sup>a</sup>   | 0.794 <sup>a</sup>   |
| D09             | 0.147                | 0.040                | 0.636                | 0.113                | 0.792 <sup>a</sup>   | 0.579                | 0.160                | 0.049                | 0.966 <sup>a,*</sup> | 0.322                | 0.438 <sup>c</sup>   | 0.694                | 0.312                |
| D10             | 0.714 <sup>a</sup>   | 0.535                | 0.089                | 0.498                | 0.884 <sup>a</sup>   | 0.776 <sup>a</sup>   | 0.749 <sup>a</sup>   | 0.631                | 0.653                | 0.753 <sup>a,*</sup> | 0.885 <sup>a</sup>   | 0.020                | 0.424                |
| D11             | 0.824 <sup>a</sup>   | 0.699 <sup>a</sup>   | 0.163                | 0.729 <sup>a</sup>   | 0.805 <sup>a</sup>   | 0.822 <sup>a</sup>   | 0.867 <sup>a</sup>   | 0.802 <sup>a</sup>   | 0.426                | 0.884 <sup>a</sup>   | 0.919 <sup>a,*</sup> | 0.308                | 0.641                |
| D12             | 0.298                | 0.192                | 0.859 <sup>a</sup>   | 0.455                | 0.531                | 0.010                | 0.153                | 0.357                | 0.940 <sup>a</sup>   | 0.147                | 0.079 <sup>c</sup>   | 0.895 <sup>a,*</sup> | 0.685                |
| D13             | 0.779 <sup>a</sup>   | 0.627                | 0.668                | 0.809 <sup>a</sup>   | 0.152                | 0.550                | 0.739 <sup>a</sup>   | 0.818 <sup>a</sup>   | 0.426                | 0.676                | 0.621 <sup>b</sup>   | 0.855 <sup>a</sup>   | 0.874 <sup>a,*</sup> |

17 <sup>a</sup> P<0.01; \* designated pair

18

19 **Supplemental Table S5.** Number and percentage of sequencing reads of ChIP-seq mapped  
20 onto the allotetraploid cotton (AD) genome sequence.

21

| Sample ID     | Clean Reads | Mapped Reads | Mapped Rate (%) | Uniquely Mapped Reads | Uniquely Mapped Rate (%) |
|---------------|-------------|--------------|-----------------|-----------------------|--------------------------|
| TM-1_1R-input | 25,182,189  | 24,632,041   | 97.82           | 15,950,480            | 63.34                    |
| TM-1_1R-IP    | 25,028,831  | 24,219,563   | 96.77           | 15,854,549            | 63.35                    |
| TM-1_2R-input | 26,470,323  | 25,861,008   | 97.70           | 16,764,139            | 63.33                    |
| TM-1_2R-IP    | 27,365,259  | 26,410,617   | 96.51           | 17,557,866            | 64.16                    |

22

23 **Supplemental Table S6.** Correlation coefficients of immunostaining densities (enriched with  
 24 H3K4me3) in the distal portions between A and D homoeologous chromosomes in *G.*  
 25 *hirsutum* (TM-1).

| A \ D | A01                  | A02                  | A03                  | A04                  | A05                  | A06                  | A07                  | A08                  | A09                  | A10                  | A11                  | A12                  | A13                  |
|-------|----------------------|----------------------|----------------------|----------------------|----------------------|----------------------|----------------------|----------------------|----------------------|----------------------|----------------------|----------------------|----------------------|
| D01   | 0.938 <sup>a,1</sup> | 0.898 <sup>a</sup>   | 0.855 <sup>a</sup>   | 0.760 <sup>a</sup>   | 0.446                | 0.737 <sup>a</sup>   | 0.658                | 0.878 <sup>a</sup>   | 0.512                | 0.892 <sup>a</sup>   | 0.413                | 0.735 <sup>a</sup>   | 0.829 <sup>a</sup>   |
| D02   | 0.499                | 0.824 <sup>a</sup>   | 0.839 <sup>a</sup>   | 0.809 <sup>a</sup>   | 0.190                | 0.664 <sup>a</sup>   | 0.573                | 0.476                | 0.648                | 0.657                | 0.126                | 0.272                | 0.662 <sup>a</sup>   |
| D03   | 0.791                | 0.962 <sup>a,2</sup> | 0.867 <sup>a</sup>   | 0.728                | 0.211                | 0.849 <sup>a</sup>   | 0.725                | 0.852 <sup>a</sup>   | 0.097                | 0.763 <sup>a</sup>   | 0.108                | 0.543                | 0.892 <sup>a,2</sup> |
| D04   | 0.800 <sup>a</sup>   | 0.817 <sup>a</sup>   | 0.408                | 0.929 <sup>a,1</sup> | 0.723                | 0.741                | 0.462                | 0.511                | 0.475                | 0.865 <sup>a</sup>   | 0.680                | 0.061                | 0.738                |
| D05   | 0.559                | 0.334                | 0.013                | 0.196                | 0.955 <sup>a,1</sup> | 0.351                | 0.683                | 0.121                | 0.721 <sup>a</sup>   | 0.593                | 0.600                | 0.428                | 0.101                |
| D06   | 0.566                | 0.724 <sup>a</sup>   | 0.717 <sup>a</sup>   | 0.590                | 0.612                | 0.885 <sup>a,1</sup> | 0.643                | 0.499                | 0.183                | 0.784                | 0.627                | 0.321                | 0.641                |
| D07   | 0.760 <sup>a</sup>   | 0.808 <sup>a</sup>   | 0.803 <sup>a</sup>   | 0.655                | 0.617                | 0.821 <sup>a</sup>   | 0.681 <sup>a,3</sup> | 0.610                | 0.134                | 0.828 <sup>a</sup>   | 0.599                | 0.377                | 0.722 <sup>a</sup>   |
| D08   | 0.450                | 0.733 <sup>a</sup>   | 0.796 <sup>a</sup>   | 0.853 <sup>a</sup>   | 0.184                | 0.641                | 0.470                | 0.909 <sup>a,1</sup> | 0.625                | 0.710 <sup>a</sup>   | 0.117                | 0.858 <sup>a,2</sup> | 0.832 <sup>a</sup>   |
| D09   | 0.035                | 0.301                | 0.681                | 0.800 <sup>a</sup>   | 0.671                | 0.228                | 0.177                | 0.730                | 0.974 <sup>a,1</sup> | 0.061                | 0.712                | 0.920 <sup>a</sup>   | 0.529                |
| D10   | 0.552                | 0.789 <sup>a</sup>   | 0.584                | 0.467                | 0.858 <sup>a</sup>   | 0.755                | 0.436                | 0.450                | 0.107                | 0.871 <sup>a,1</sup> | 0.870 <sup>a</sup>   | 0.195                | 0.628                |
| D11   | 0.893 <sup>a</sup>   | 0.930 <sup>a</sup>   | 0.892 <sup>a,2</sup> | 0.630                | 0.692                | 0.827 <sup>a</sup>   | 0.835 <sup>a,2</sup> | 0.812 <sup>a</sup>   | 0.350                | 0.947 <sup>a,2</sup> | 0.958 <sup>a,1</sup> | 0.634                | 0.885 <sup>a</sup>   |
| D12   | 0.185                | 0.485                | 0.782 <sup>a</sup>   | 0.869 <sup>a</sup>   | 0.461                | 0.431                | 0.021                | 0.825 <sup>a</sup>   | 0.954                | 0.160                | 0.489                | 0.52 <sup>a,1</sup>  | 0.672                |
| D13   | 0.582                | 0.807 <sup>a</sup>   | 0.617                | 0.516                | 0.142                | 0.758 <sup>a</sup>   | 0.482                | 0.492                | 0.700                | 0.682                | 0.094                | 0.249                | 0.876 <sup>a,1</sup> |

26

27 <sup>a</sup> P<0.01; <sup>1</sup> designated pair (marked in yellow); <sup>2</sup> highest value but not designated pair  
 28 (green); <sup>3</sup> low correlation coefficients of the designated pair (pink).

29
